# Supplementary material for: Weakly-supervised tumor purity prediction from frozen H&E stained slides
Source: PubMed Central journal article supplement — eBioMedicine. 2022 May 26;80:104067. doi: 10.1016/j.ebiom.2022.104067 (PMC9157012; doi:10.1016/j.ebiom.2022.104067), 2022-05-26
Supplement: mmc2.pdf [file mmc2.pdf]

| Cancer Type   | Tissue Type | Training | Validation | Testing |
|---------------|-------------|----------|------------|---------|
| ACC           | Cancer      | 58       | 16         | 6       |
|               | Normal      | 2        | 1          | 1       |
| BRCA          | Cancer      | 930      | 222        | 200     |
|               | Normal      | 150      | 38         | 39      |
| HNSC          | Cancer      | 417      | 91         | 82      |
|               | Normal      | 18       | 7          | 3       |
| LUAD and LUSC | Cancer      | 961      | 175        | 199     |
|               | Normal      | 341      | 98         | 77      |
| OV            | Cancer      | 311      | 65         | 82      |
|               | Normal      | 109      | 27         | 26      |
| PRAD          | Cancer      | 361      | 75         | 84      |
|               | Normal      | 78       | 22         | 18      |
| Total         | -           | 3736     | 837        | 817     |
